# Supplementary material for: Complete dissipation of 2,4,6-trinitrotoluene by in-vessel composting
Source: Royal Society of Chemistry journal article supplement (doi:10.1039/c5ra07997g), 2015-01-01
Supplement: c5ra07997g1.pdf [file c5ra07997g1.pdf]

**Electronic Supplementary Information**

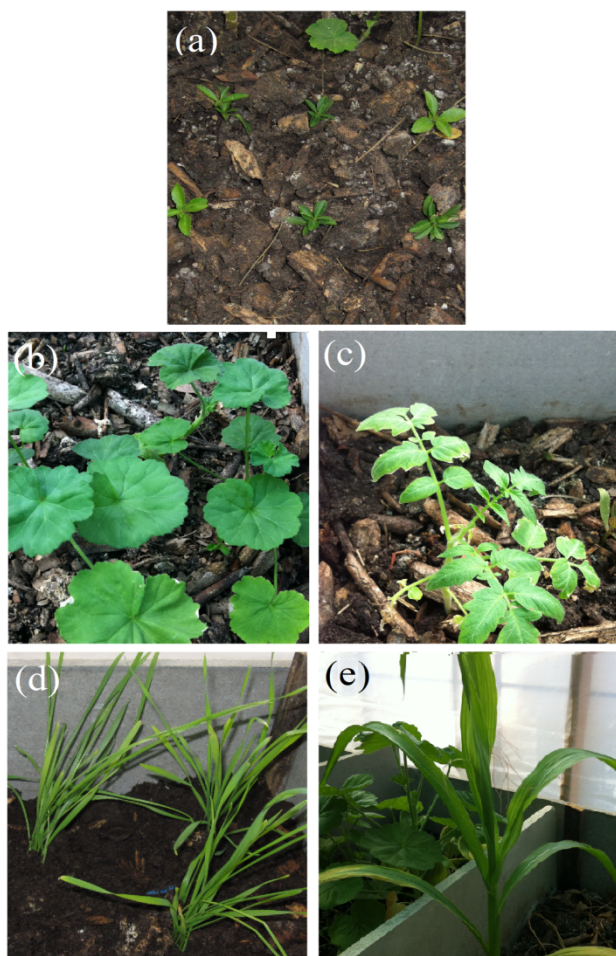

**S1.** Phytotoxicity test of remediated composts. (a) 1<sup>st</sup> week of growth, and 10<sup>th</sup> week of (b) pelargonium, (c) tomato, (d) wheat, and (e) corn cultivated in final composts.
